# Supplementary material for: A photocatalytic carbon monoxide-generating effervescent microneedle patch for improved transdermal chemotherapy
Source: Royal Society of Chemistry journal article supplement (doi:10.1039/d2tb02613a), 2023-01-01
Supplement: d2tb02613a1.pdf [file d2tb02613a1.pdf]

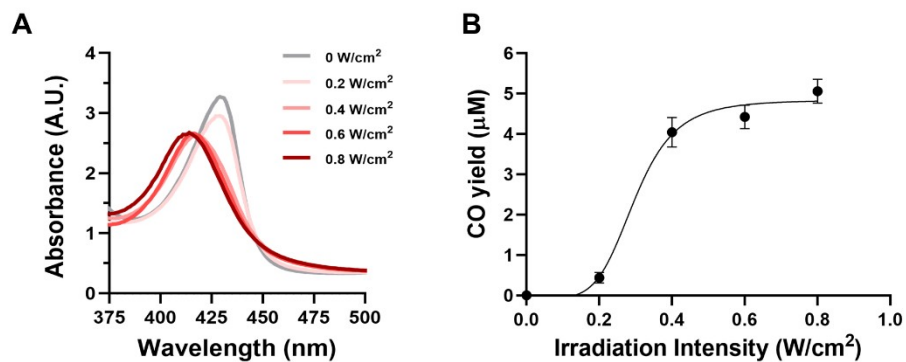

**Fig.S1** (A) Hemoglobin assay for detecting CAL-catalyzed CO under different irradiation intensity, and (B) corresponding CO yield, under 5 min 660 nm irradiation, n = 3.

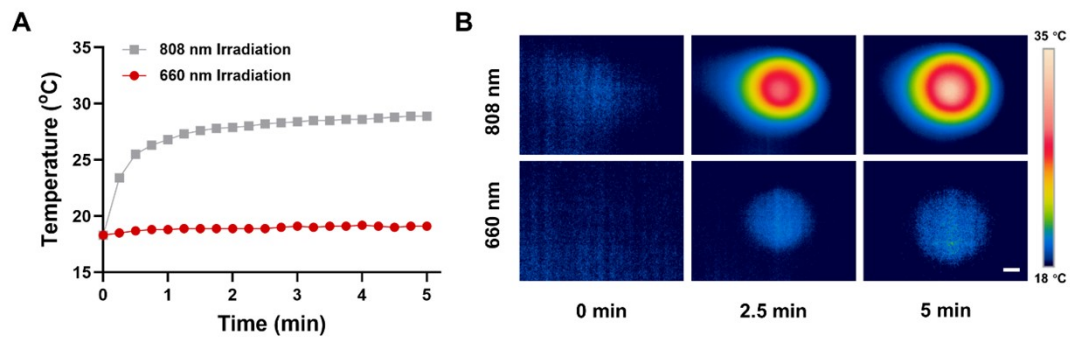

**Fig.S2** (A) Temperature curves of CAL upon 808 nm and 660 nm laser irradiation (400 mW/cm<sup>2</sup>), and (B) representative infrared thermal images at 0, 2.5, 5 min (scale bar: 1 mm).

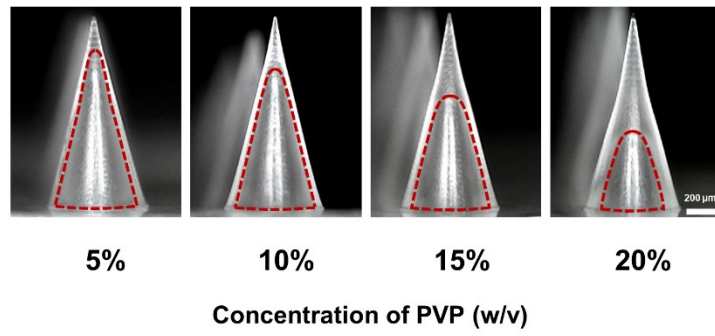

**Fig.S3** Representative MNs with micro-cavities, fabricated with different concentrations of PVP (5–20%, w/v).

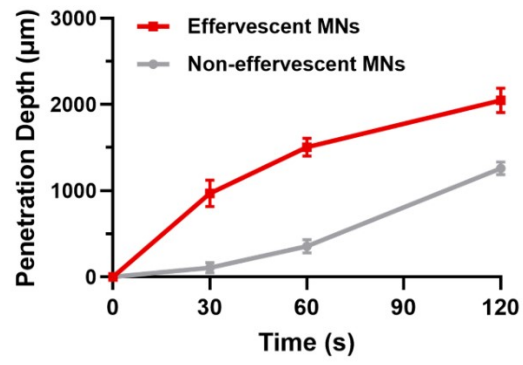

**Fig.S4** Corresponding penetration depth of Dox·HCl at different time points by effervescent and non-effervescent MNs penetrating hydrogen model, n = 4.

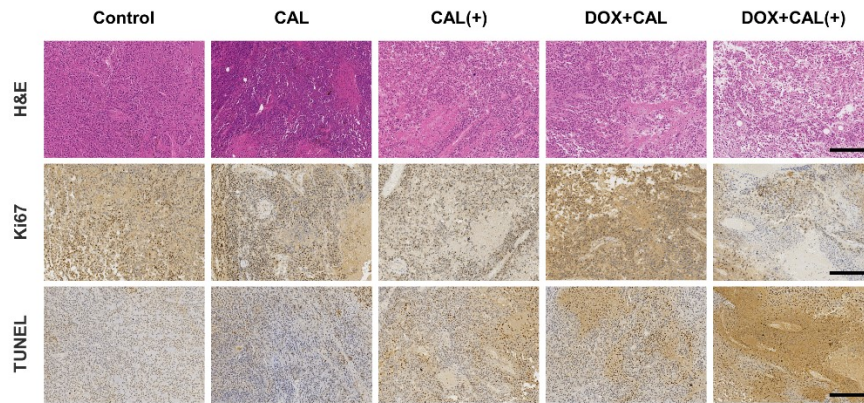

**Fig.S5** Representative images of H&E, Ki67, and TUNEL stained tumor tissues isolated from the B16F10-bearing nude mice (scale bar: 200  $\mu$ m).

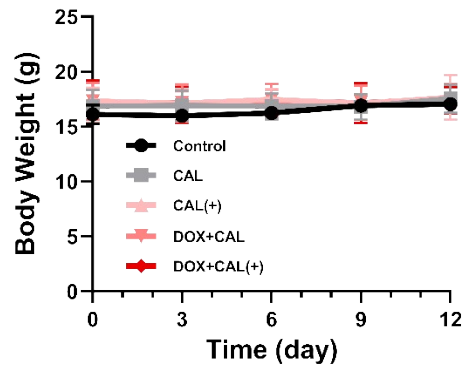

Fig.S6 Body weight changes of nude mice during the treatments.
